# Supplementary material
Source: publisher figshare collection journal article supplement (https://frontiersin.figshare.com/ndownloader/files/23918042)
Supplement: Supplementary file [file 23918042]

**SUPPLEMENTARY TABLE 1. Viruses used to measure viral neutralizing activity**

| <b>Virus</b> | <b>Clade</b> | <b>Tier</b> |
|--------------|--------------|-------------|
| SC42266.8    | B            | 2           |
| RHPA4259.7   | B            | 2           |
| REJO4541.67  | B            | 2           |
| TRJO4551.58  | B            | 3           |
| Du156.12     | C            | 2           |
| Du172.17     | C            | 2           |
| Du422.1      | C            | 2           |
| ZM55F.PB28a  | C            | 2           |
| 2249_13_2_1  | CRF_01AE     | 2           |
| 2316_14_22_3 | CRF_01AE     | 2           |
| 2149_39_2_2  | CRF_01AE     | 2           |
| 2498_40_32_4 | CRF_01AE     | 2           |

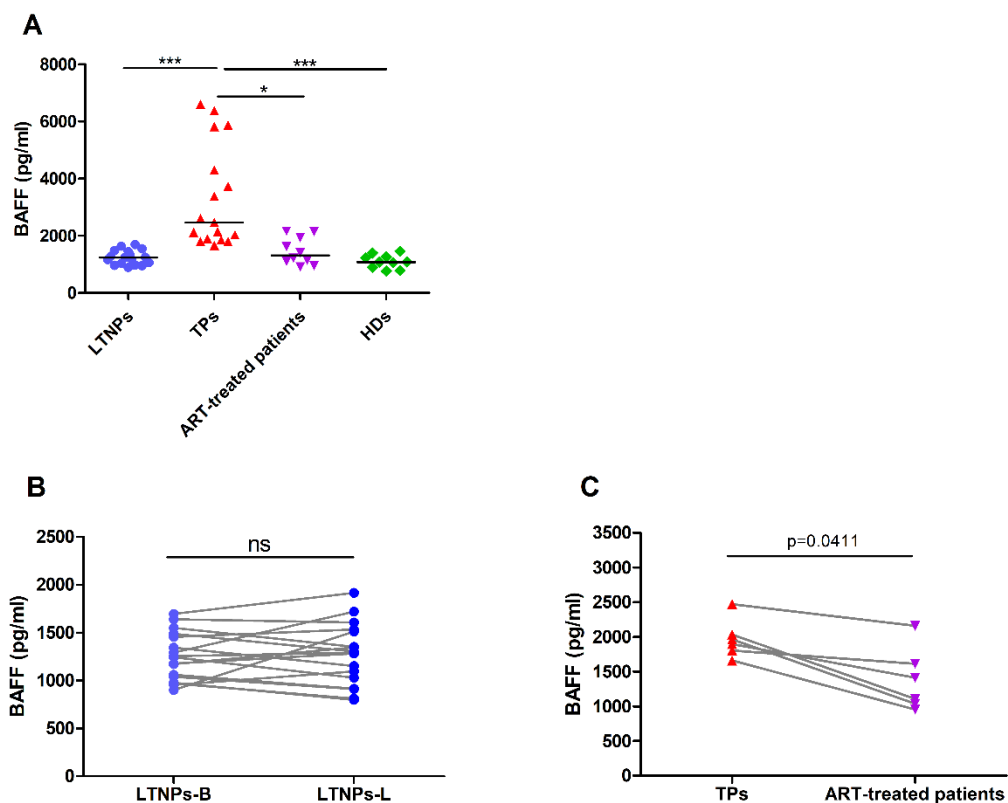

**SUPPLEMENTARY FIGURE 1. Cross-sectional and longitudinal plasma levels of BAFF in the study participants.** (A) Plasma levels of BAFF in LTNPs (n=17), TPs(n=17), ART+(n=10) and HDs(n=10). (B) Longitudinal analysis of the BAFF levels over 4 years in the LTNPs (n = 17). (C) Longitudinal analysis of the BAFF levels in the TPs before and after ART (n = 6). LTNPs, long-term nonprogressors; TPs, typical progressors; ART, antiretroviral therapy; HDs, healthy donors; LTNPs-B, long-term nonprogressors at baseline; LTNPs-L, long-term nonprogressors at the latest measurement; ns, not significant. Intergroup comparisons were performed using a Kruskal–Wallis test, followed by Dunn’s post-test; Paired comparisons were analyzed in a Wilcoxon matched-pairs test. (\*P < 0.05, \*\*\*P < 0.001).

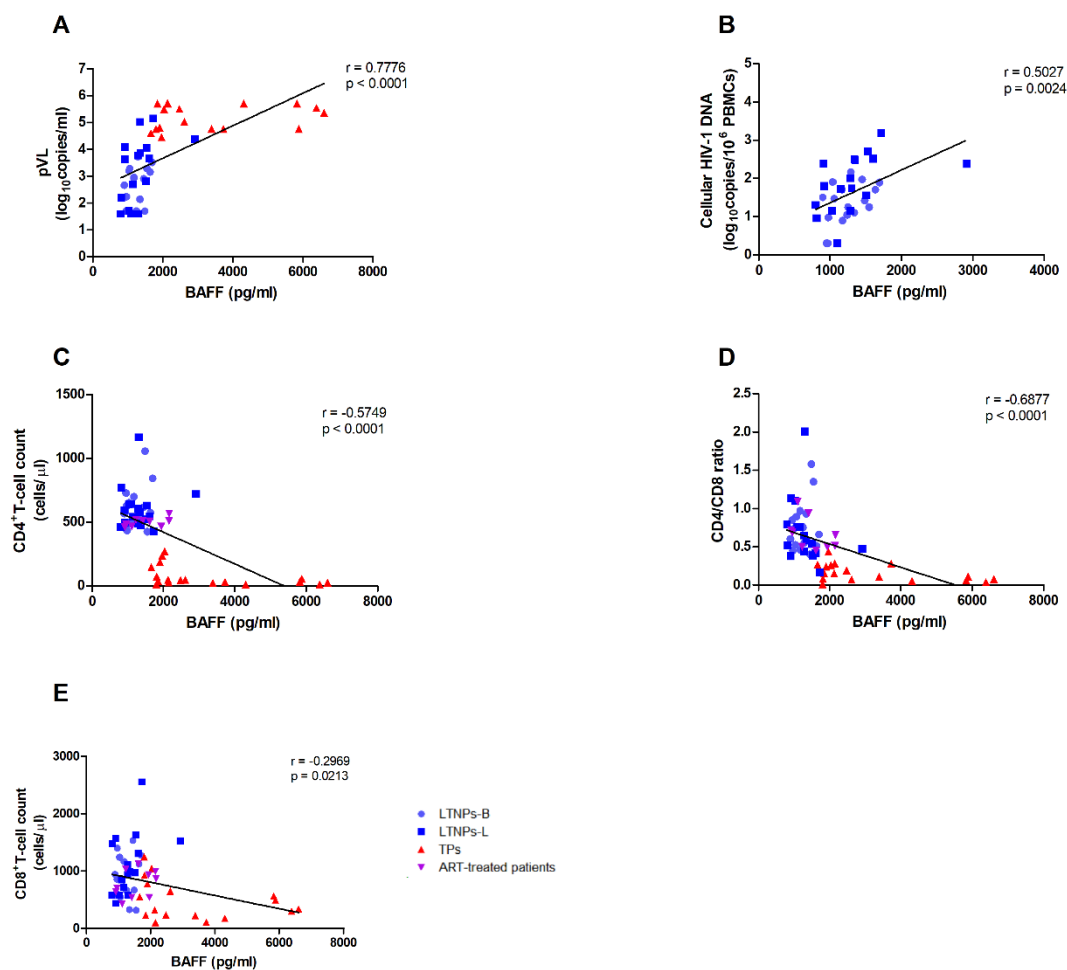

**SUPPLEMENTARY FIGURE 2. Relationships between the plasma levels of BAFF and markers of HIV-1 disease progression.** (A) Relationships between the BAFF levels and plasma HIV-1 RNA viral load in untreated HIV-1-infected individuals (n=51). (B) Relationships between the BAFF levels and cellular HIV-1 DNA levels in the LTNPs (n=34). (C) Relationships between the BAFF levels and CD4<sup>+</sup>T-cell count in HIV-1-infected individuals (n=61). (D) Relationships between BAFF levels and CD4/CD8 ratio in HIV-1-infected individuals (n=60). (E) Relationships between the BAFF levels and CD8<sup>+</sup>T-cell count in HIV-1-infected individuals (n=60). LTNP-B, long-term nonprogressors at baseline; LTNP-L, long-term nonprogressors at the latest measurement; TPs, typical progressors; ART, antiretroviral therapy. P and r values were calculated by Spearman's rank correlation tests.

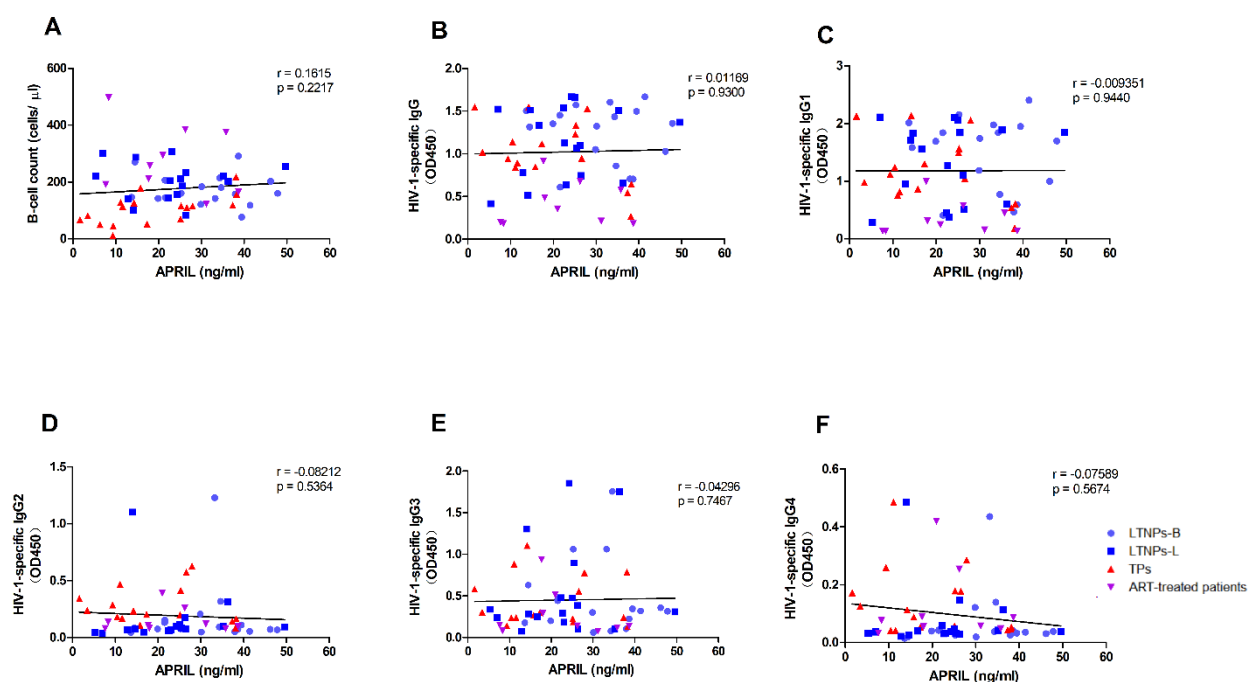

**SUPPLEMENTARY FIGURE 3. Associations between the plasma levels of APRIL and humoral immune responses.** Associations between the APRIL levels and B-cell count (A), IgG (B), IgG1 (C), IgG2 (D), IgG3 (E) and IgG4 (F) in HIV-1-infected individuals (n=59). LTNP-B, long-term nonprogressors at baseline; LTNP-L, long-term nonprogressors at the latest measurement; TP, typical progressors; ART, antiretroviral therapy. P and r values were calculated by Spearman's rank correlation tests.

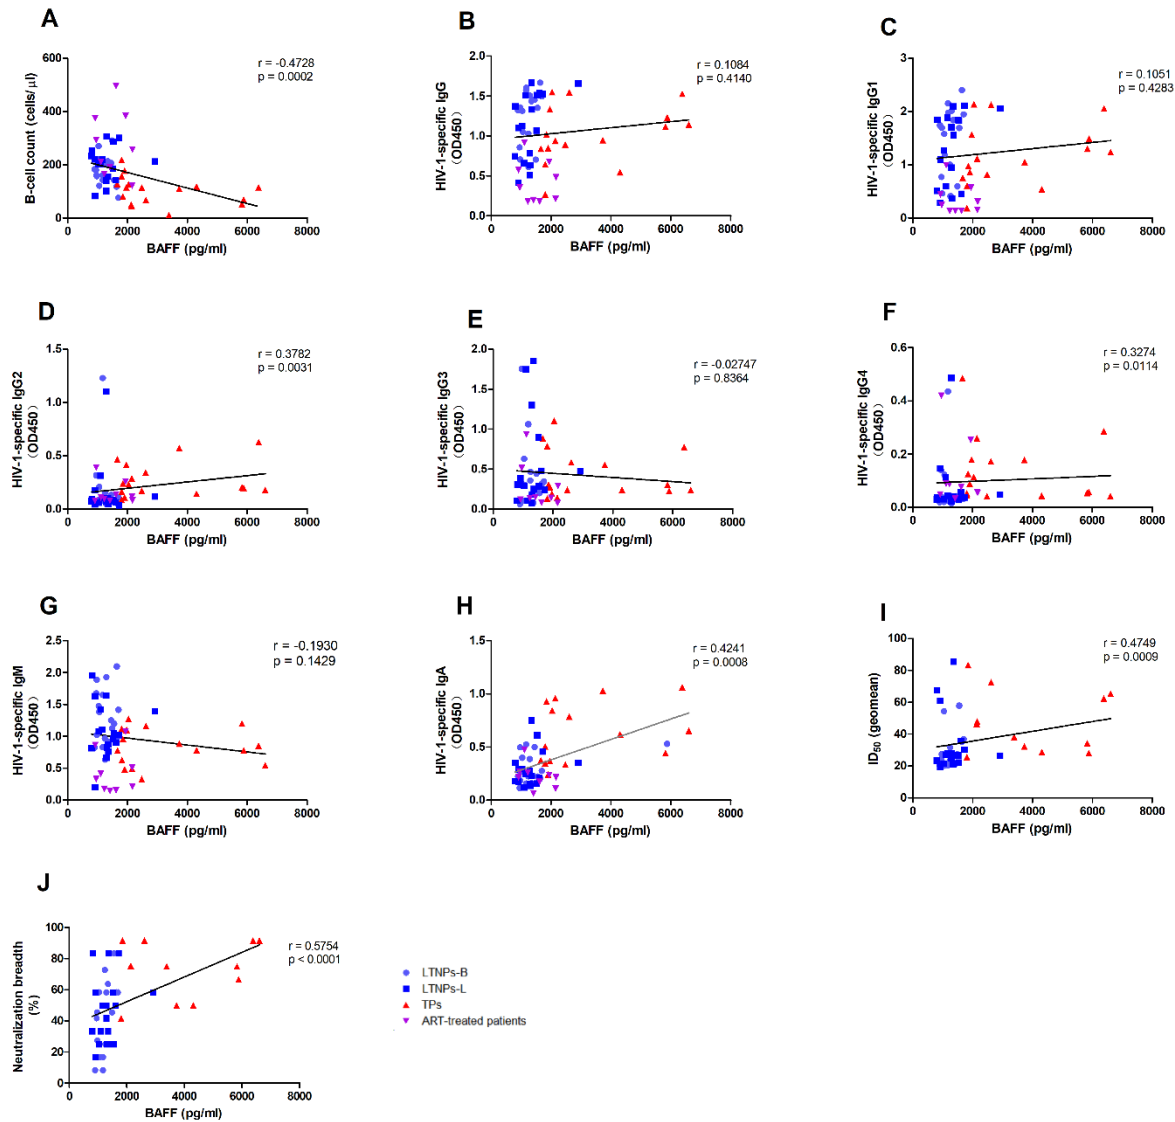

**SUPPLEMENTARY FIGURE 4. Associations between the plasma levels of BAFF and B cell and immunoglobulin production.** (A) Associations between the BAFF levels and B-cell count in HIV-1-infected individuals (n=59). (B-H) Associations between the BAFF levels and HIV-1-specific IgG, IgG1, IgG2, IgG3, IgG4, IgM and IgA in HIV-1-infected individuals (n=59). (I-J) Associations between the BAFF levels and neutralization titers and breadth in untreated HIV-1-infected individuals (n=46). LTNP-B, long-term nonprogressors at baseline; LTNP-L, long-term nonprogressors at the latest measurement; TP, typical progressors; ART, antiretroviral therapy; ID<sub>50</sub>, 50% inhibitory dilution. P and r values were calculated by Spearman's rank correlation tests.

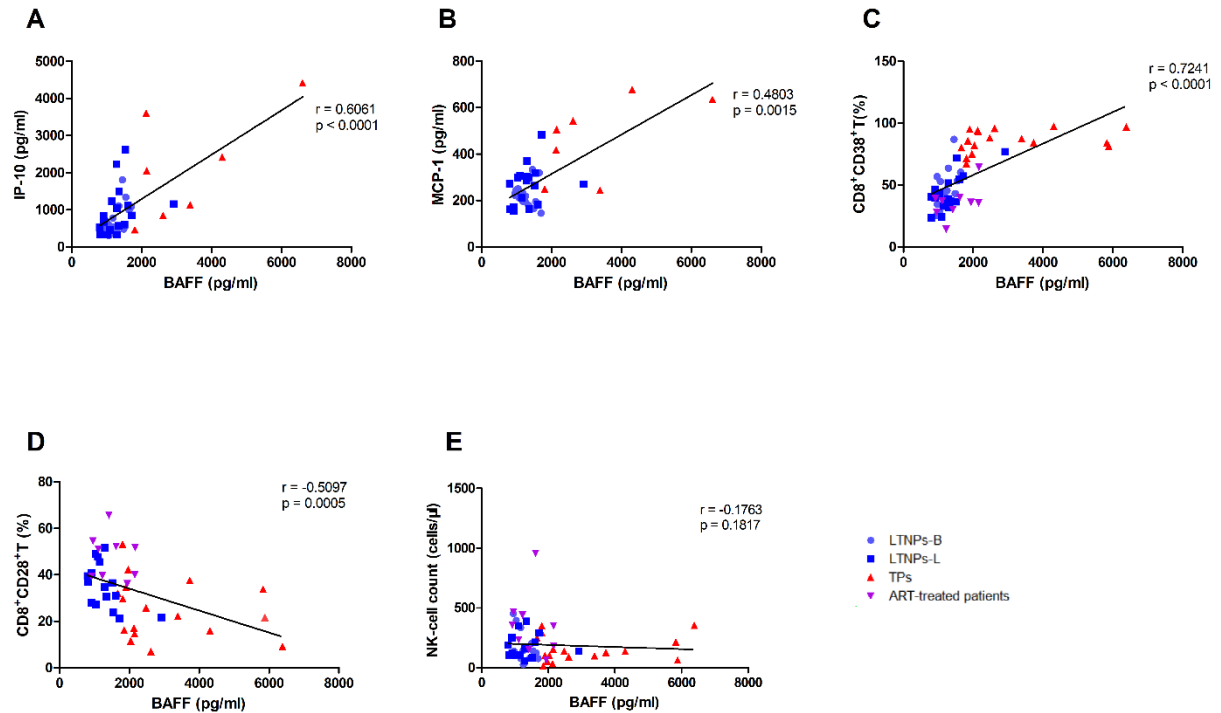

**SUPPLEMENTARY FIGURE 5. Correlations the between plasma levels of BAFF and markers of immune activation and functional cells.** (A) Correlations between the BAFF and IP-10 levels in untreated HIV-1-infected individuals (n=41). (B) Correlations between the BAFF and MCP-1 levels in untreated HIV-1-infected individuals (n=41). (C) Correlations between BAFF and the proportion of CD8<sup>+</sup>CD38<sup>+</sup>T cells in HIV-1-infected individuals (n=59). (D) Correlations between BAFF and the proportion of CD8<sup>+</sup>CD28<sup>+</sup>T cells in HIV-1-infected individuals (n=43). (E) Correlations between BAFF and the NK-cell count in HIV-1-infected individuals (n=59). LTNPs-B, long-term nonprogressors at baseline; LTNPs-L, long-term nonprogressors at the latest measurement; TPs, typical progressors; ART, antiretroviral therapy. P and r values were calculated by Spearman's rank correlation tests.
